# Supplementary material
Source: publisher figshare collection journal article supplement (https://gsapubs.figshare.com/ndownloader/files/22743446)
Supplement: Supplementary file 1 [file 22743446]

## DATA REPOSITORY ITEM

### APPENDIX A - PALEOMAGNETIC METHODS AND RESULTS

Samples were cored in the field or collected as oriented blocks and cored in the laboratory. Pilot samples were subjected to progressive thermal and alternating field (AF) demagnetization. Thermal demagnetization proved more reliable and the remaining samples were thermally demagnetized to a peak temperature of 575 °C. Pilot AF experiments were made on several sandstone samples using procedures similar to those of Panuska (1985) to assess the reliability of the paleomagnetic results from that earlier study.

Remanence measurements were made at the University of Michigan on a three-axis cryogenic magnetometer housed in a magnetically shielded room with a peak ambient field of < 600 nT. Remanence components isolated during demagnetization were determined from visual inspection of linear segments on vector end-point diagrams (Zijderveld, 1967). Component directions were determined from a least squares fit of the observed linear trajectories (e.g., Kirschvink, 1980). Sample directions were combined to site means using simple vector addition, giving unit weight to each sample direction. Statistical parameters were calculated using the method of Fisher (1953). The fold test (Graham, 1949; McElhinny, 1964; McFadden and Jones, 1981) was used to establish the relative age of the magnetization.

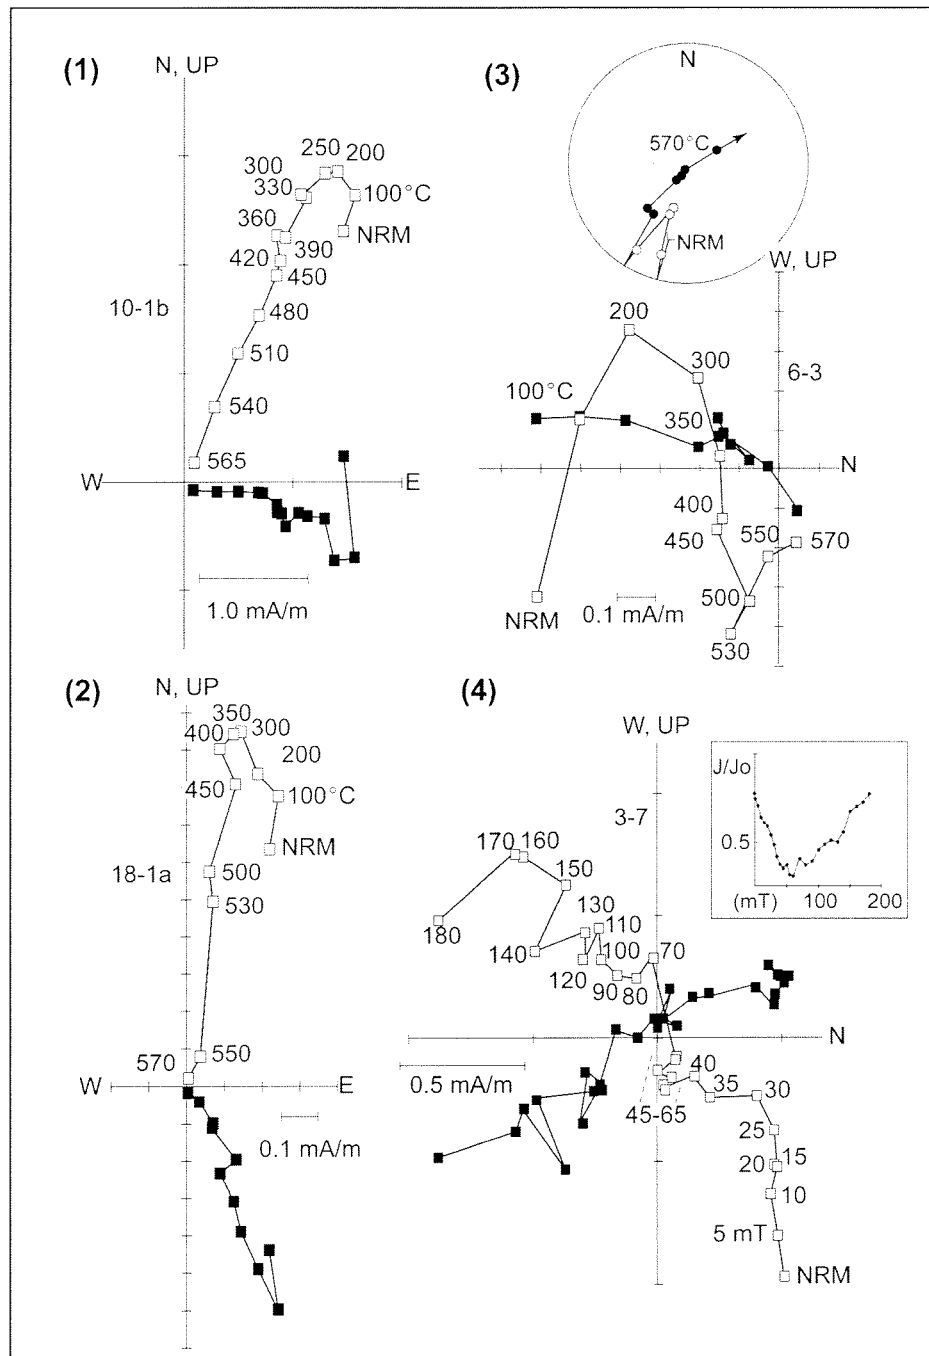

Figure A. Sample vector end-point diagrams showing thermal and alternating field demagnetization in in situ coordinates. Open and closed symbols are projections onto vertical and horizontal planes, respectively. NRM is natural remanent magnetization. Diagrams (1) and (2) show demagnetization of typical tuff samples. Diagrams (3) and (4) show demagnetization of typical lithic arkosic sandstone samples. Inset in (3) is equal-angle projection of demagnetization showing remagnetization-circle trend. Inset in (4) shows relative change in magnetization intensity as function of alternating field intensity.

**TABLE A. PALEOMAGNETIC DATA FROM THE MACCOLL RIDGE FORMATION, ALASKA**

| Site              | Lith. | n/N   | S/D    | D <sub>g</sub> | I <sub>g</sub> | D <sub>s</sub> | I <sub>s</sub> | k      | $\alpha_{95}$ | $\phi$ | $\theta$ |
|-------------------|-------|-------|--------|----------------|----------------|----------------|----------------|--------|---------------|--------|----------|
| 1                 | VC    | 4/8   | 124/40 | 189            | -43            | 137            | -72            | 11.7   | 28            | 136    | 68       |
| 2                 | Tuff  | 4/9   | 124/40 | (017)          | (-80)          | (28)           | (-39)          | (5.1)  | (46)          | -      | -        |
| 3                 | SS    | 0/7   | 120/40 | -              | -              | -              | -              | -      | -             | -      | -        |
| 4                 | Tuff  | 8/8   | 95/16  | 144            | -58            | 118            | -68            | 19.6   | 13            | 139    | 56       |
| 5                 | SS    | 3/8   | 95/16  | 155            | -68            | 112            | -79            | 34.0   | 22            | 172    | 62       |
| 6                 | SS    | 0/8   | 95/16  | -              | -              | -              | -              | -      | -             | -      | -        |
| 7                 | Tuff  | 8/8   | 150/20 | 187            | -73            | 117            | -73            | 17.4   | 14            | 151    | 60       |
| 8                 | Tuff  | 5/5   | 150/20 | 159            | -73            | 106            | -66            | 41.0   | 12            | 145    | 48       |
| 9                 | SS    | 0/6   | 271/05 | -              | -              | -              | -              | -      | -             | -      | -        |
| 10                | Tuff  | 8/9   | 271/05 | 119            | -56            | 125            | -53            | 30.6   | 10            | 115    | 46       |
| 11                | Tuff  | 10/10 | 271/05 | 103            | -73            | 118            | -72            | 20.2   | 11            | 148    | 59       |
| 12                | VC    | 6/9   | Horz.  | 178            | -61            | 179            | -61            | 21.5   | 15            | 40     | 71       |
| 13                | VC    | 9/15  | Horz.  | 152            | -60            | 153            | -60            | 19.1   | 12            | 89     | 64       |
| 14                | Tuff  | 6/7   | Horz.  | 123            | -59            | 125            | -59            | 18.1   | 16            | 120    | 51       |
| 15                | Tuff  | 7/7   | Horz.  | 165            | -65            | 166            | -64            | 21.5   | 13            | 72     | 73       |
| 16                | SS    | 3/6   | Horz.  | (008)          | (-76)          | (009)          | (-77)          | (13.5) | (35)          | -      | -        |
| 17                | Tuff  | 13/14 | Horz.  | 159            | -65            | 159            | -65            | 29.8   | 8             | 87     | 71       |
| 18                | Tuff  | 13/13 | Horz.  | 162            | -76            | 162            | -76            | 72.8   | 5             | 151    | 81       |
| 19                | Tuff  | 12/12 | 270/16 | 057            | -76            | 125            | -76            | 12.4   | 13            | 160    | 65       |
| 20                | Tuff  | 17/17 | 270/16 | 168            | -79            | 175            | -64            | 22.3   | 8             | 50     | 74       |
| 21                | SS    | 0/8   | 270/16 | -              | -              | -              | -              | -      | -             | -      | -        |
| Mean <sub>g</sub> |       | 14/21 |        | 153            | -69            |                |                | 26.7   | 8             |        |          |
| Mean (80%)        |       | 14/21 |        |                |                | 143            | -69            | 50.8   | 5             |        |          |
| Mean <sub>s</sub> |       | 14/21 |        |                |                | 140            | -69            | 47.2   | 6             |        |          |
| Paleopole         |       |       |        |                |                |                |                | 19.7   | 9*            | 126    | 68       |

Notes: Lith. is the lithology of the site (SS = sandstone, VC = volcanoclastic sandstones). n is the number of samples that produced characteristic remanent magnetization (ChRM) directions, and N is the number of samples demagnetized. S and D are the strike and dip of bedding (dip direction 90° clockwise from strike). Horz. is horizontal bedding. D<sub>g</sub> and I<sub>g</sub> (D<sub>s</sub> and I<sub>s</sub>) are the declination and inclination of the site mean in situ (tilt-corrected) coordinates, in degrees. k is the best estimate of Fisher (1953) precision parameter, and  $\alpha_{95}$  is the 95% confidence region about the mean in degrees.  $\phi$  and  $\theta$  are the longitude and latitude of the corresponding virtual geomagnetic pole, in degrees. Values in parentheses were not used to calculate the formation means. The - symbol indicates that no reliable ChRM directions were obtained from those sites.

\* For mean paleopole, the confidence interval is reported as  $A_{95}$ , in degrees.

**TABLE B. PALEOMAGNETIC SITE LOCATIONS**

| Site | Latitude | Longitude |
|------|----------|-----------|
| 1    | 61.19028 | 142.4577  |
| 2    | 61.19028 | 142.4577  |
| 3    | 61.19210 | 142.4579  |
| 4    | 61.18916 | 142.4621  |
| 5    | 61.18916 | 142.4621  |
| 6    | 61.18916 | 142.4621  |
| 7    | 61.18866 | 142.4734  |
| 8    | 61.18866 | 142.4734  |
| 9    | 61.17960 | 142.4755  |
| 10   | 61.17960 | 142.4755  |
| 11   | 61.17960 | 142.4755  |
| 12   | 61.17147 | 142.4515  |
| 13   | 61.17147 | 142.4515  |
| 14   | 61.17167 | 142.4415  |
| 15   | 61.17167 | 142.4415  |
| 16   | 61.17167 | 142.4415  |
| 17   | 61.17421 | 142.4384  |
| 18   | 61.17421 | 142.4384  |
| 19   | 61.16910 | 142.4199  |
| 20   | 61.16910 | 142.4199  |
| 21   | 61.16910 | 142.4199  |

## REFERENCES FOR APPENDIX A

- Fisher, R.A., 1953, Dispersion on a sphere: Royal Society of London Proceedings, ser. A, v. 217, p. 295–305.
- Graham, J.W., 1949, The stability and significance of magnetism in sedimentary rocks: Journal of Geophysical Research, v. 54, p. 131–167.
- Kirschvink, J.L., 1980, The least-squares line and plane and the analysis of paleomagnetic data: Royal Astronomical Society Geophysical Journal, v. 62, p. 699–718.
- McElhinny, M., 1964, Statistical significance of the fold test in paleomagnetism: Royal Astronomical Society Geophysical Journal, v. 8, p. 338–340.
- McFadden, P.L., and Jones, D.L., 1981, The fold test in paleomagnetism: Royal Astronomical Society Geophysical Journal, v. 67, p. 53–58.
- Panuska, B.C., 1985, Paleomagnetic evidence for post-Cretaceous accretion of Wrangellia: Geology, v. 13, p. 880–883.
- Zijderveld, J.D.A., 1967, AC demagnetization of rocks: Analysis of results, *in* Runcorn S.K., et al., eds., Methods in paleomagnetism: Amsterdam, Elsevier Science, p. 254–286.
